# Supplementary material for: Mechanism of pH influence on aptamer binding with Cd2+ revealed by molecular dynamics simulation
Source: Royal Society of Chemistry journal article supplement (doi:10.1039/d2nj06122h), 2023-01-01
Supplement: d2nj06122h3.pdf [file d2nj06122h3.pdf]

**Mechanism of pH influence on aptamer binding with Cd<sup>2+</sup> revealed  
by molecular dynamics simulation**

*Hongen Yuan, Xiuxiu Wu\*, Xingfa Ren, Bin Xue, Wenjie Qiu, Dinghui Nong, Tao Yang, Fei Xu*

*School of Health Science and Engineering, Shanghai Engineering Research Center of Food Rapid  
Detection, University of Shanghai for Science and Technology, Shanghai, 200093, China.*

**Supplementary material**

**Electronic Supplementary Material (ESI) for New Journal of Chemistry.**

\* Corresponding author:

Dr. Xiuxiu Wu

E-mail: xiuxiuwu@usst.edu.cn

Tel: 86-15721517751

Address: Nr. 516, Jungong Road, Shanghai 200093, P.R China

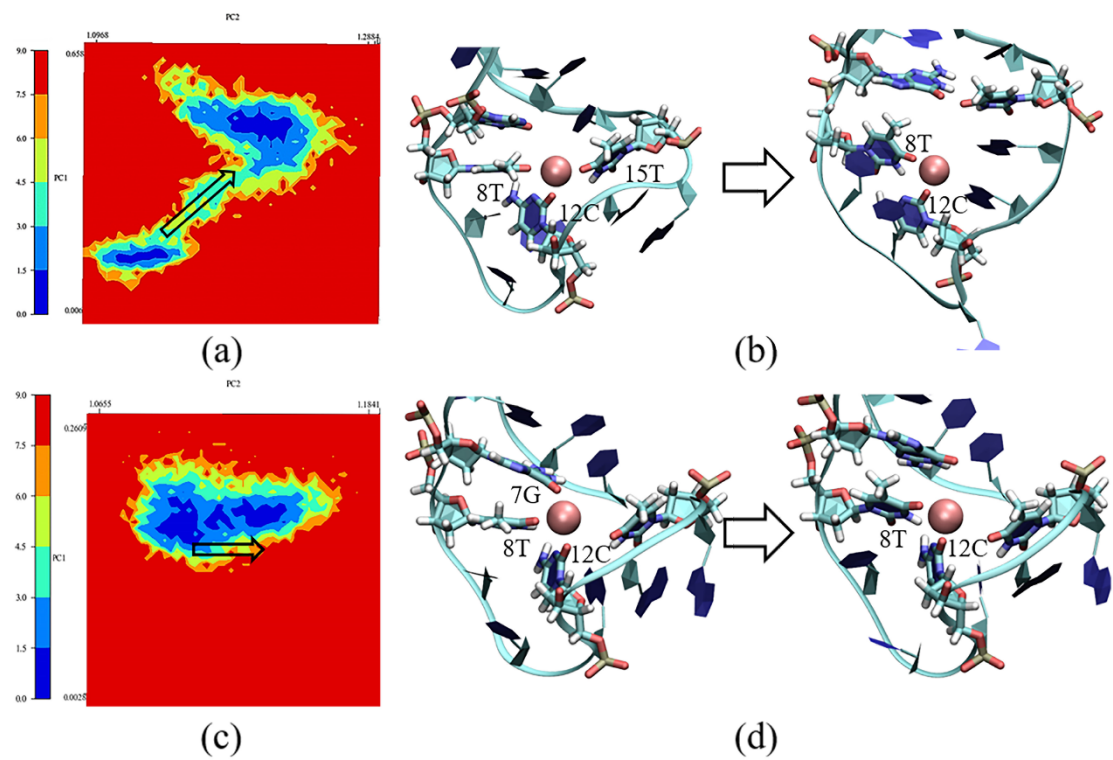

Fig. S1 The Free energy landscapes (FEL) plots of two parallel trajectories (a) and (c). (b) and (d) are snapshots of the structural transition of the  $\text{Cd}^{2+}$ -aptamer complexes at the two minimum positions in the FEL of (a) and (c), respectively. The arrow indicated the structural transformation trend obtained over time.
