# Supplementary figures and images for: Mechanism of pH influence on aptamer binding with Cd2+ revealed by molecular dynamics simulation
Source: Royal Society of Chemistry journal article supplement (doi:10.1039/d2nj06122h), 2023-01-01

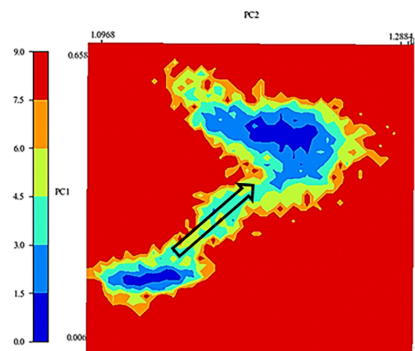

(a)

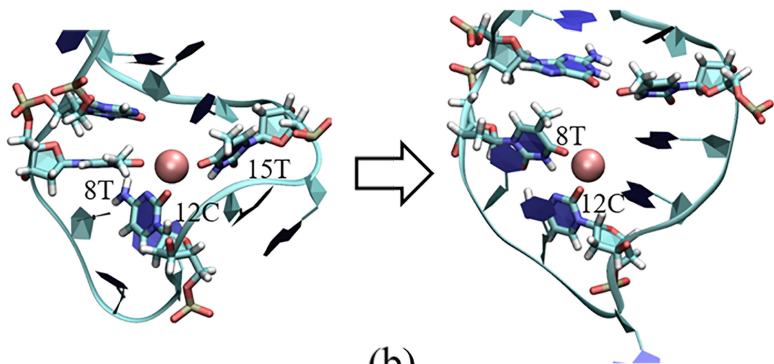

(b)

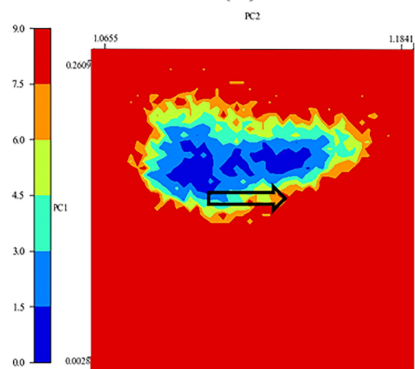

(c)

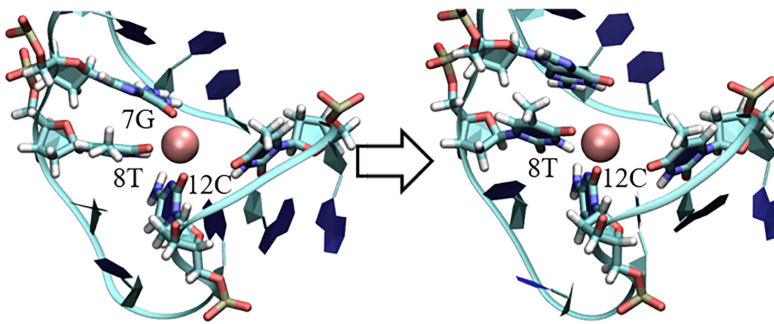

(d)

Supplement: d2nj06122h2.pdf [file d2nj06122h2.pdf]
